# Supplementary material for: Effectiveness of 7-chloro-4-(phenylselanyl) quinoline in improving learning, short-term memory, and anxiety-like behaviors in a mimetic model of Parkinson's disease in Drosophila melanogaster
Source: Royal Society of Chemistry journal article supplement (doi:10.1039/d2nj04011e), 2022-01-01
Supplement: d2nj04011e1.pdf [file d2nj04011e1.pdf]

**Supplementary material:**

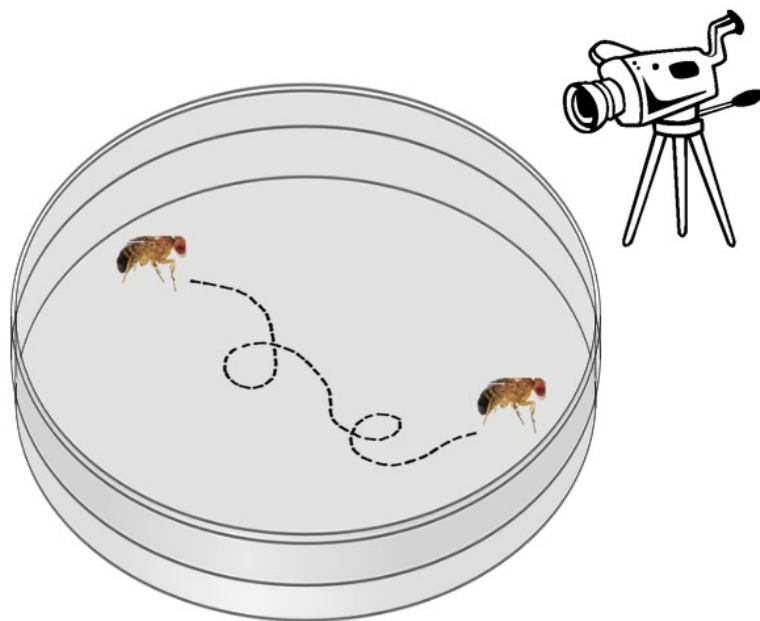

Diameter: 52.0 mm; height: 7.0 mm.

**Fig. S. 1.** Apparatus used for the open field test.

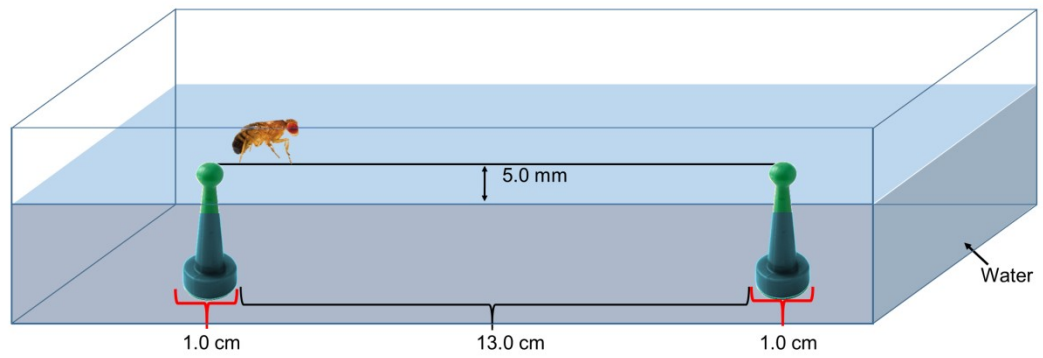

Length: 22.0 cm; width: 12.0 cm; height: 2.5 cm.

**Fig. S. 2.** Apparatus used for the evaluation of the equilibrist test.

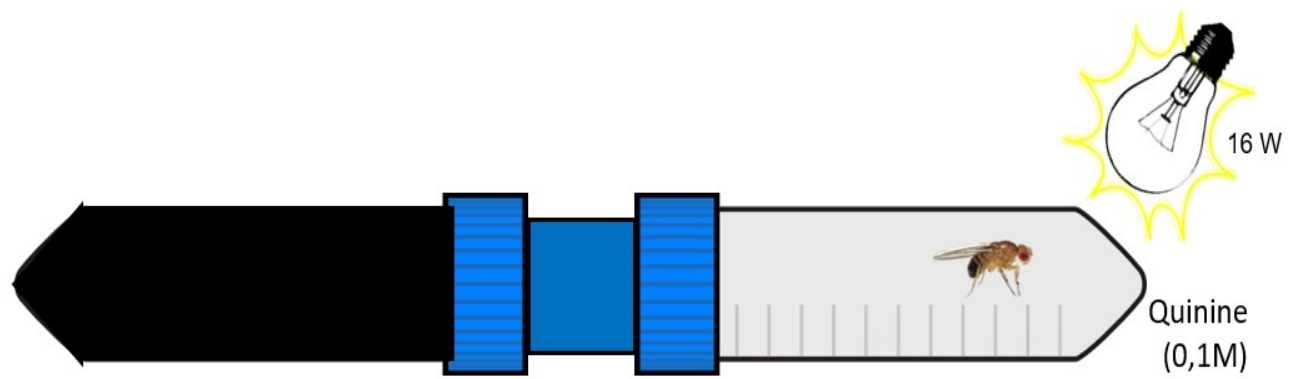

Capacity: 12.0 mL; length: 10.5 cm; internal diameter: 1.5 cm, (in each compartment), connected by central platform with approximately 2.5 cm of length.

**Fig. S. 3.** Apparatus for aversive phototaxis suppression assay.

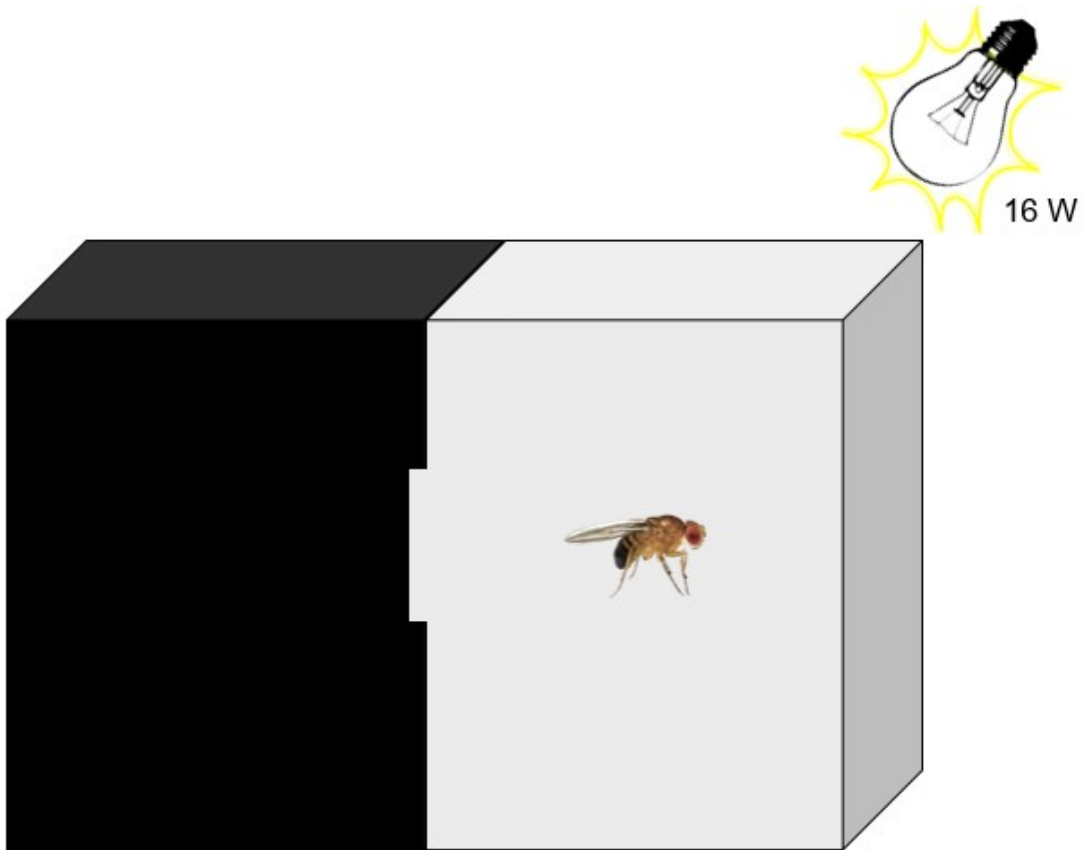

Length: 3.0 cm; width:1.5 cm; height: 3.6 cm in each compartment.

**Fig. S. 4.** Apparatus used for light/dark test.

**A) CONTROL**

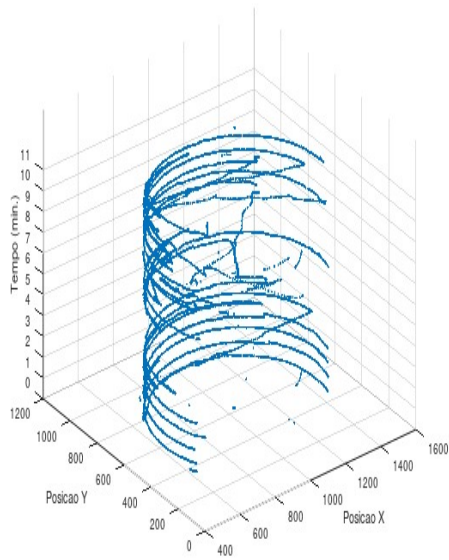

**B) 4-PSQ**

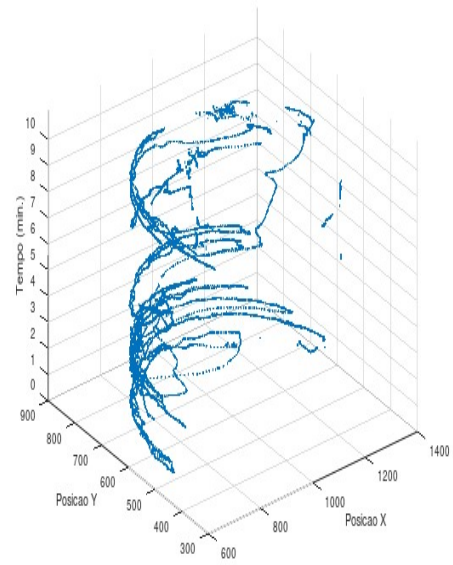

**C) ROT**

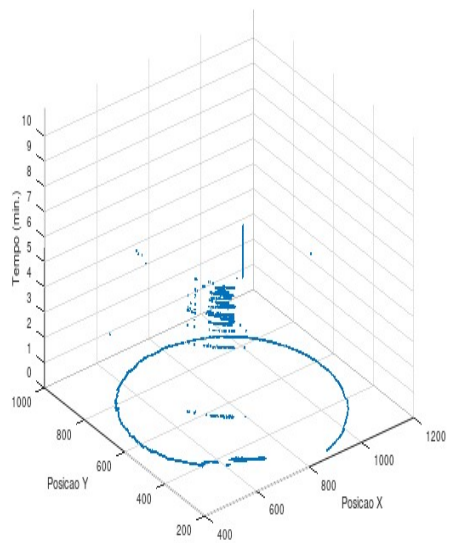

**D) ROT+ 4-PSQ**

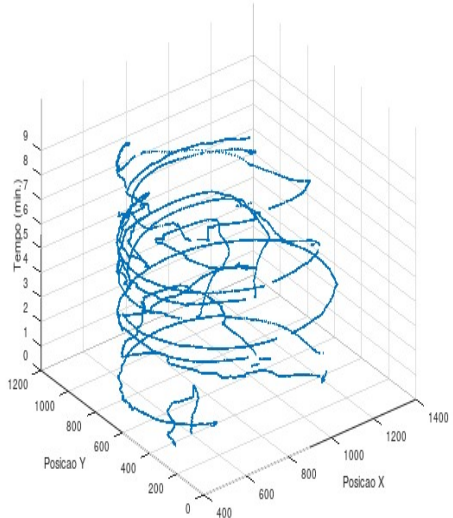

**Fig. S.5.** Images of the trajectories traversed in the open field test of each experimental group's fly, obtained through the idTracker program (Pérez-Escudero et al., 2014) and processed by GNU Octave. The blue line represents the trajectories of the flies. Figure (A) represents the trajectories of control group fly, (B) 4-PSQ (25  $\mu$ M) group, (C) ROT (500  $\mu$ M) group, and (D) 4-PSQ (25  $\mu$ M) + ROT (500  $\mu$ M) group).
